# Supplementary material for: Targeted Drug Delivery Technologies Potentiate the Overall Therapeutic Efficacy of an Indole Derivative in a Mouse Cystic Fibrosis Setting
Source: MDPI journal article supplement (doi:10.3390/cells10071601), 2021-06-25
Supplement: s1 [file s1]

**Table S1.** List of primers.

|                         |                                                                          |
|-------------------------|--------------------------------------------------------------------------|
| <b>Murine</b>           |                                                                          |
| <i>β-actin</i>          | forward AGCCATGTACGTAGCCATCC, reverse CTCTCAGCTGTGGTGGTGAA               |
| <i>Cyp1a1</i>           | forward ACAGTGATTGGCAGAGATCG, reverse GAAGGGGAC-GAAGGATGAAT              |
| <i>Cyp1b1</i>           | forward TTCTCCAGCTTTTGCCTGT, reverse TAATGAAGCCGTCCTTGTCC                |
| <i>Il10</i>             | forward GAGAAGCATGGCCCAGAAATCAAG, reverse ATCACTCTTCAC-CTGCTCCACTGC      |
| <i>Il1b</i>             | forward TGACGGACCCCAAAAGATGAAGG, reverse CCACGGGAAAGA-CACAGGTAGC         |
| <i>Il1ra</i>            | forward TTGTGCCAAGTCTGGAGATG, reverse CAGCTGACTCAAA-GCTGGTG              |
| <i>Il22</i>             | forward CTGCCTGCTTCTCATTTGCCCTGTG, reverse GATGTACGGCTGCTG-GAAGTTGG      |
| <i>Il25</i>             | forward ACCACAACCAGACGGTCTTC, reverse ACACACACACAA-GCCAAGGA              |
| <i>Il33</i>             | forward TCCTGCCTCCCTGAGTACAT, reverse CACCTGGTCTTGCTCTTGGT               |
| <i>Il6</i>              | forward CCGGAGAGGAGACTTCACAG, reverse TCCACGATTTCACAGA-GAAC              |
| <i>Il9</i>              | forward TGACCAGCTGCTTGTGTCTC, reverse GTGGCATTGGTCAGCTG-TAA              |
| <i>Ll37</i>             | forward GGCGGTCACTATCACTGCTGCTG, reverse TCACTCGGAAC-CTCACAGACTTG        |
| <i>Muc2</i>             | forward GACTGCCGAGACTCTACAA, reverse CTT-GTGGGTGAGGTAGATGG               |
| <i>Muc5ac</i>           | forward CTGGACCTGGAGGTTGTATG, reverse CAGTAGTGAGGGTT-GGATGG              |
| <i>Reg3b</i>            | forward ATACCCTCCGCACGCATTAGTTG, reverse CTCCATTCCCATCCAC-CTCCATTG       |
| <i>Reg3g</i>            | forward AAGGTGAAGTTGCCAAGAAAG, reverse CATTGCTCCAC-TCCCATCC              |
| <i>Tnfa</i>             | forward CGAGTGACAAGCCTGTAGCC, reverse AAGAGAACCTGGGAG-TAGACAAG           |
| <b>Bacteria</b>         |                                                                          |
| Actinobacteria          | forward TACGGCCGCAAGGCTA, reverse CGCGGCCTATCAGCTTGTG                    |
| Bacteroidetes           | forward GGARCATGTGGTTTAATTTCGATGAT, reverse AGCTGACGACAAC-CATGCAG        |
| Proteobacteria          | forward CCGCAAGGTTAAACTCAAAGGAA, reverse CAGA-CATGTCAAGGGTAGGTAAGG       |
| BetaProteobacte-<br>ria | forward GAGTGGCGAACGGGTGAGTAATA, reverse TCCGCGAG-CATGAGGTCTTG           |
| Enterobacteri-<br>aceae | forward CAGGTCGTCACGGTAACAAG, reverse GTGGTTCAGTTTCAG-CATGTAC            |
| <i>E. coli</i>          | forward CAAGTCATCATGGCCCTTAC, reverse CGGACTACGACGCAC-TTTAT              |
| Firmicutes              | forward GGAGYATGTGGTTTAATTCTGAAGCA, reverse AGCTGACGACAAC-CATGCAC        |
| Clostridiaceae          | forward AGCGTTGTCCGGATTTACTG, reverse CGCTTAC-CTCTCCGACACTC              |
| Lactobacillaceae        | forward TGGATGCCTTGGCACTAGGA, reverse AAATCTCCGGATCAAA-GCTTACTTAT        |
| <i>L. reuteri</i>       | forward ACCGAGAACCACCGGTTATTT, reverse CATAACTTAAC-CTAAACAATCAAAGATTGTCT |

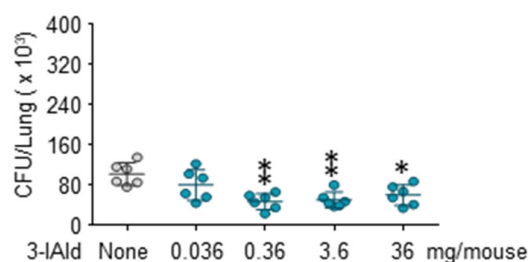

**Figure S1.** Dose-dependent activity of 3-IAld in vivo. C57BL/6 mice were infected with *Aspergillus* conidia and treated with 3-IAld at different doses intranasally. Fungal growth ( $\text{Log}_{10}$  CFU in the lung). Values represent the mean  $\pm$  SD of 6 mice per group. None, infected mice. \*  $p < 0.05$ ; \*\*  $p < 0.01$ , One-way ANOVA - Bonferroni's, treated vs None mice.

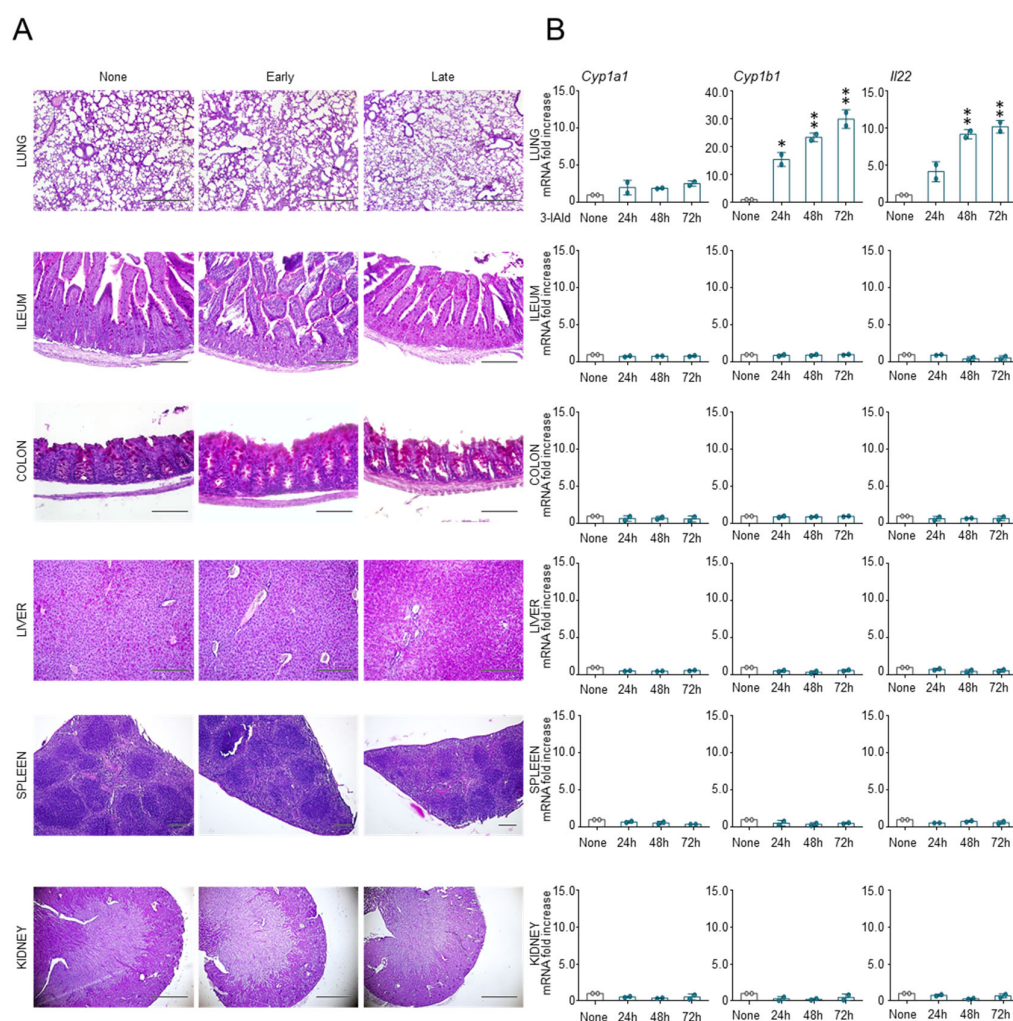

**Figure S2.** Lack of systemic toxicity and AhR activation in *Cfr*<sup>F508del/F508del</sup> mice administered with 3-IAld-PI. Mice received 4.5 mg/kg of 3-IAld directly delivered into the lung by pulmonary insufflation (PI) and evaluated for (A) signs of tissue pathology in the indicated organs 3 (early) and 7 (late) days later and (B) activation of AhR-target genes 24, 48 and 72 hours later. Photographs of PAS-stained sections were taken using a high-resolution Olympus DP71 microscope using an x10 objective. Scale bars, 100 (colon), 200 (ileum and liver), 400 (lung and spleen)  $\mu\text{m}$  and 1mm (kidney). (B) AhR-gene expression in total cells from the different organs by RT-PCR. Values represent the mean  $\pm$  SD of 2 mice per group. \*  $p < 0.05$ ; \*\*  $p < 0.01$ , treated versus untreated mice (None); One-way ANOVA - Bonferroni's.
